# Supplementary material for: Analysis of Conservative Treatment Trends for Lumbar Disc Herniation with Radiculopathy in Korea: A Population-Based Cross-Sectional Study
Source: MDPI journal article supplement (doi:10.3390/healthcare11162353), 2023-08-21
Supplement: s1 [file s1]

## Supplementary Material

**Supplementary Table S1. Classification of medication.**

| Category              | Anatomical Therapeutic Chemical Classification Code                                                                                                                                                                                                                                                                                                                                                                                                                                                                                                                                                                                                                                                                                                                                                                                                                                                                                                                                                                                                                                                                                                                                              |
|-----------------------|--------------------------------------------------------------------------------------------------------------------------------------------------------------------------------------------------------------------------------------------------------------------------------------------------------------------------------------------------------------------------------------------------------------------------------------------------------------------------------------------------------------------------------------------------------------------------------------------------------------------------------------------------------------------------------------------------------------------------------------------------------------------------------------------------------------------------------------------------------------------------------------------------------------------------------------------------------------------------------------------------------------------------------------------------------------------------------------------------------------------------------------------------------------------------------------------------|
| Opioids               | N02A (opioids)                                                                                                                                                                                                                                                                                                                                                                                                                                                                                                                                                                                                                                                                                                                                                                                                                                                                                                                                                                                                                                                                                                                                                                                   |
| Non-opioid analgesics | M01A (anti-inflammatory and antirheumatic products, non-steroids), M01C (specific antirheumatic agents), M02A (topical products for joint and muscular pain), M03 (muscle relaxants), N02B (other analgesics and antipyretics), N03A (anti-epileptics)                                                                                                                                                                                                                                                                                                                                                                                                                                                                                                                                                                                                                                                                                                                                                                                                                                                                                                                                           |
| Aesthetics            | N01 (anesthetics)                                                                                                                                                                                                                                                                                                                                                                                                                                                                                                                                                                                                                                                                                                                                                                                                                                                                                                                                                                                                                                                                                                                                                                                |
| Gastrointestinal      | A02AA (magnesium compounds), A02AA02 (magnesium oxide), A02AA04 (magnesium hydroxide), A02AB (aluminum compounds), A02AB01 (aluminum hydroxide), A02AB03 (aluminum phosphate), A02AC01 (calcium carbonate), A02AD01 (ordinary salt combinations), A02AD03 (almagate), A02AD04 (hydrotalcite), A02AD05 (almasilate), A02AX (antacids, other combinations), A02B (drugs for peptic ulcer and gastro-esophageal reflux disease (GORD)), A02X (other drugs for acid-related disorders), A03 (drugs for functional gastrointestinal disorders), A06 (drugs for constipation), A07 (antidiarrheals, intestinal anti-inflammatory/anti-infective agents), A09 (digestives, incl. enzymes), A16 (other alimentary tract and metabolism products)                                                                                                                                                                                                                                                                                                                                                                                                                                                         |
| Antipsychotics        | N05 (psycholeptics), N06 (psychoanaleptics), N07 (other nervous system drugs)                                                                                                                                                                                                                                                                                                                                                                                                                                                                                                                                                                                                                                                                                                                                                                                                                                                                                                                                                                                                                                                                                                                    |
| Antibiotics           | D01 (antifungals for dermatological use), D06A (antibiotics for topical use), D06BB (sulfonamides and other antibacterials for topical use), D06BX (other topical antibiotics), G01A (anti-infectives and antiseptics for gynecological use), J01 (antibacterials for systemic use), J02 (antimycotics for systemic use), J04 (drugs for treatment of tuberculosis), J05 (antivirals for systemic use)                                                                                                                                                                                                                                                                                                                                                                                                                                                                                                                                                                                                                                                                                                                                                                                           |
| Steroids              | D07 (corticosteroids for topical use), H02 (corticosteroids for systemic use)                                                                                                                                                                                                                                                                                                                                                                                                                                                                                                                                                                                                                                                                                                                                                                                                                                                                                                                                                                                                                                                                                                                    |
| Others                | A01A (stomatological preparations), A05 (bile and liver therapy), A10 (drugs used in diabetes), A11 (vitamins), A12 (mineral supplements), B01A (antithrombotic agents), B02 (antihemorrhagics), B03 (anti-anemic preparations), B05 (blood substitutes and perfusion solutions), C (cardiovascular system), D02A (emollients and protectives), D03A (preparations for treatment of wounds and ulcers), D05 (antipsoriatics), D06 (antibiotics and chemotherapeutics for dermatological use), D08 (antiseptics and disinfectants), D11 (other dermatological preparations), G02 (other gynecologicals), G03 (sex hormones and modulators of the genital system), G04 (urologicals), H01 (pituitary and hypothalamic hormones and analogues), H03 (thyroid therapy), H05 (calcium homeostasis), J06 (immune sera and immunoglobulins), L (antineoplastic and immunomodulating agents), M04 (antigout preparations), M05 (drugs for treatment of bone diseases), M09 (other drugs for disorders of the musculo-skeletal system), N02 (analgesics), N04 (anti-Parkinson's drugs), P (antiparasitic products, insecticides, and repellents), R (respiratory system), S (sensory organs), V (various) |

**Supplementary Table S2. Annual average KRW–USD exchange rate and healthcare price index.**

| <b>Year</b> | <b>KRW/USD</b> | <b>Healthcare and medical service price index</b> |
|-------------|----------------|---------------------------------------------------|
| 2010        | 1156           | 0.9164                                            |
| 2011        | 1107.99        | 0.9325                                            |
| 2012        | 1126.76        | 0.9410                                            |
| 2013        | 1095.04        | 0.9444                                            |
| 2014        | 1053.12        | 0.9510                                            |
| 2015        | 1131.52        | 0.9629                                            |
| 2016        | 1160.41        | 0.9725                                            |
| 2017        | 1130.48        | 0.9810                                            |
| 2018        | 1100.58        | 0.9805                                            |
| 2019        | 1166.11        | 0.9851                                            |
| 2020        | 1180.01        | 1.0000                                            |

**Notes:** this information is available on the Korean Statistical Information Service website (<http://kosis.kr>), which represents the relative price levels of adjusted costs, as of 2020.

**Supplementary Table S3. Medical use and cost of non-surgical treatment for lumbar radiculopathy.**

| Year | Category            | Korean medicines | Medication      | Nerve blocks   | Others         | Physiotherapy   | TPI         |
|------|---------------------|------------------|-----------------|----------------|----------------|-----------------|-------------|
| 2010 | No. of patients (%) | 1,185 (5.95%)    | 16,149 (81.12%) | 4,636 (23.29%) | 8,952 (44.97%) | 12,103 (60.80%) | 503 (2.53%) |
|      | Medical costs       | USD 73,924       | USD 344,307     | USD 403,233    | USD 53,246     | USD 592,613     | USD 9,720   |
| 2011 | No. of patients (%) | 1,379 (6.50%)    | 17,173 (80.96%) | 4,991 (23.53%) | 9,018 (42.51%) | 12,772 (60.21%) | 465 (2.19%) |
|      | Medical costs       | USD 116,598      | USD 378,949     | USD 504,719    | USD 62,386     | USD 634,556     | USD 7,555   |
| 2012 | No. of patients (%) | 1,393 (6.19%)    | 18,252 (81.04%) | 6,023 (26.74%) | 8,961 (39.79%) | 12,918 (57.36%) | 357 (1.59%) |
|      | Medical costs       | USD 123,233      | USD 360,584     | USD 679,677    | USD 56,367     | USD 604,935     | USD 6,505   |
| 2013 | No. of patients (%) | 1,480 (6.45%)    | 18,477 (80.49%) | 6,265 (27.29%) | 9,032 (39.34%) | 12,974 (56.51%) | 412 (1.79%) |
|      | Medical costs       | USD 138,954      | USD 350,197     | USD 757,890    | USD 64,000     | USD 644,952     | USD 7,187   |
| 2014 | No. of patients (%) | 1,522 (6.48%)    | 18,916 (80.51%) | 6,978 (29.70%) | 8,759 (37.28%) | 12,993 (55.30%) | 393 (1.67%) |
|      | Medical costs       | USD 156,910      | USD 390,679     | USD 957,798    | USD 74,842     | USD 686,472     | USD 6,555   |
| 2015 | No. of patients (%) | 1,495 (6.24%)    | 19,319 (80.69%) | 7,377 (30.81%) | 8,506 (35.53%) | 13,049 (54.50%) | 408 (1.70%) |
|      | Medical costs       | USD 153,504      | USD 373,665     | USD 1,013,400  | USD 72,617     | USD 614,573     | USD 7,705   |
| 2016 | No. of patients (%) | 1,388 (5.69%)    | 19,807 (81.17%) | 8,058 (33.02%) | 8,303 (34.03%) | 12,993 (53.25%) | 386 (1.58%) |
|      | Medical costs       | USD 142,713      | USD 419,074     | USD 1,063,903  | USD 70,252     | USD 606,109     | USD 6,074   |
| 2017 | No. of patients (%) | 1,329 (5.39%)    | 20,114 (81.52%) | 8,541 (34.61%) | 8,256 (33.46%) | 12,859 (52.11%) | 397 (1.61%) |
|      | Medical costs       | USD 149,261      | USD 432,011     | USD 1,218,973  | USD 78,968     | USD 623,613     | USD 6,205   |
| 2018 | No. of patients (%) | 1,420 (5.61%)    | 20,682 (81.72%) | 8,810 (34.81%) | 8,184 (32.34%) | 12,642 (49.95%) | 418 (1.65%) |
|      | Medical costs       | USD 156,590      | USD 504,103     | USD 1,391,060  | USD 95,328     | USD 631,604     | USD 8,805   |
| 2019 | No. of patients (%) | 1,801 (6.81%)    | 21,432 (81.05%) | 9,349 (35.36%) | 7,695 (29.10%) | 12,549 (47.46%) | 416 (1.57%) |
|      | Medical costs       | USD 292,438      | USD 566,898     | USD 1,500,957  | USD 87,162     | USD 609,558     | USD 8,196   |

TPI: trigger point injection.

**Supplementary Table S4. Medical use of different nerve blocks.**

| <b>Year</b> | <b>Category</b>     | <b>Epidural nerve block</b> | <b>Peripheral branch of the spinal nerve block</b> | <b>Spinal nerve plexus, root, or ganglion block</b> |
|-------------|---------------------|-----------------------------|----------------------------------------------------|-----------------------------------------------------|
| 2010        | No. of patients (%) | 2,727 (14.06)               | 1,465 (7.55)                                       | 1,239 (6.39)                                        |
|             | Medical costs       | USD 179,812                 | USD 86,832                                         | USD 132,759                                         |
| 2011        | No. of patients (%) | 2,917 (14.10)               | 1,496 (7.23)                                       | 1,408 (6.81)                                        |
|             | Medical costs       | USD 226,420                 | USD 81,314                                         | USD 192,010                                         |
| 2012        | No. of patients (%) | 3,351 (15.23)               | 1,606 (7.30)                                       | 2,024 (9.20)                                        |
|             | Medical costs       | USD 263,107                 | USD 92,430                                         | USD 316,911                                         |
| 2013        | No. of patients (%) | 3,410 (15.24)               | 1,491 (6.67)                                       | 2,345 (10.48)                                       |
|             | Medical costs       | USD 259,610                 | USD 88,157                                         | USD 404,073                                         |
| 2014        | No. of patients (%) | 3,432 (15.02)               | 1,599 (7.00)                                       | 2,985 (13.07)                                       |
|             | Medical costs       | USD 286,329                 | USD 106,050                                        | USD 555,241                                         |
| 2015        | No. of patients (%) | 3,446 (14.78)               | 1,602 (6.87)                                       | 3,500 (15.01)                                       |
|             | Medical costs       | USD 257,159                 | USD 95,205                                         | USD 650,126                                         |
| 2016        | No. of patients (%) | 3,590 (15.12)               | 1,647 (6.94)                                       | 4,010 (16.89)                                       |
|             | Medical costs       | USD 269,464                 | USD 101,281                                        | USD 681,839                                         |
| 2017        | No. of patients (%) | 3,769 (15.65)               | 1,646 (6.84)                                       | 4,397 (18.26)                                       |
|             | Medical costs       | USD 279,889                 | USD 109,579                                        | USD 816,236                                         |
| 2018        | No. of patients (%) | 3,682 (14.96)               | 1,715 (6.97)                                       | 4,828 (19.62)                                       |
|             | Medical costs       | USD 292,612                 | USD 120,707                                        | USD 961,053                                         |
| 2019        | No. of patients (%) | 3,558 (13.84)               | 1,847 (7.18)                                       | 5,442 (21.17)                                       |
|             | Medical costs       | USD 277,771                 | USD 130,504                                        | USD 1,073,605                                       |
